# Supplementary material
Source: PubMed Central journal article supplement (PMC4084459)
Supplement: 1409433111_pnas.201409433SI.pdf [file 1409433111_pnas.201409433SI.pdf]

# Supporting Information

Nguyen et al. 10.1073/pnas.1409433111

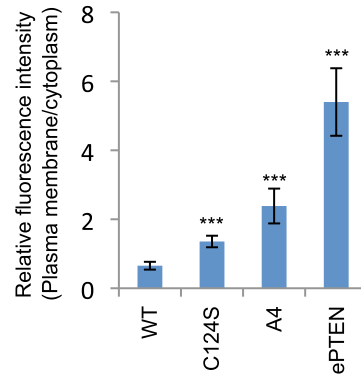

**Fig. S1.** HEK293T cells expressing the indicated forms of PTEN-GFP were observed by fluorescence microscopy. Intensity of GFP at the plasma membrane was quantified relative to that at the cytosol. Values represent the mean  $\pm$  SD ( $n \geq 10$ ).

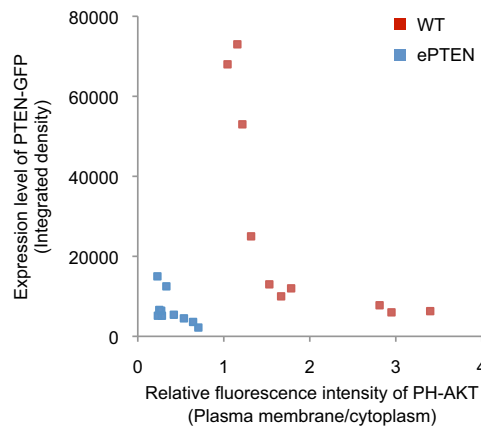

**Fig. S2.** HEK293T cells expressing PH<sub>AKT</sub>-RFP along with PTEN-GFP (WT) or enhanced PTEN (ePTEN)-GFP were observed by fluorescence microscopy. The x axis indicates the relative fluorescence intensity of PH<sub>AKT</sub>-RFP at the plasma membrane and the y axis shows the total fluorescence intensity of GFP. Each square represents single cells.

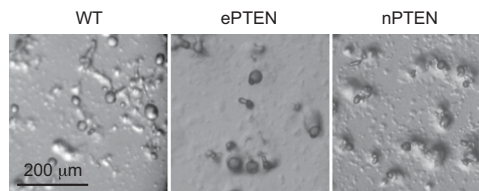

**Fig. S3.** PTEN-null *Dictyostelium* cells expressing different PTEN-GFP constructs were starved for 36 h to induce differentiation into fruiting bodies.



**Table S2. Plasmids**

| Plasmids                              | Description                                                                                                                                  | Source               |
|---------------------------------------|----------------------------------------------------------------------------------------------------------------------------------------------|----------------------|
| pKF3                                  |                                                                                                                                              | (1)                  |
| pKF3-hPTEN                            | hPTEN amplified using primers HuPTEN5BamHI2 and HuPTEN3XhoI2 and inserted into BglII/XhoI pKF3                                               | (1)                  |
| pKF3-A4                               | A4 amplified using primers HuPTEN5BamHI2 and HuPTEN3XhoI2 and inserted into BglII/XhoI pKF3                                                  | (1)                  |
| pKF3-Q17R                             | hPTEN mutated using primers HuPTEN5BamHI2, HuPTEN3XhoI2, PTEN-Q17R-f, and PTEN-Q17R-r and inserted into BglII/XhoI pKF3                      | This study           |
| pKF3-R41G                             | hPTEN mutated using primers HuPTEN5BamHI2, HuPTEN3XhoI2, PTEN-R41G-f, and PTEN-R41G-r and inserted into BglII/XhoI pKF3                      | This study           |
| pKF3-E73D                             | hPTEN mutated using primers HuPTEN5BamHI2, HuPTEN3XhoI2, PTEN-E73D-f, and PTEN-E73D-r and inserted into BglII/XhoI pKF3                      | This study           |
| pKF3-Q17R,R41G                        | R41G mutated using primers HuPTEN5BamHI2, HuPTEN3XhoI2, PTEN-Q17R-f, and PTEN-Q17R-r and inserted into BglII/XhoI pKF3                       | This study           |
| pKF3-Q17R,E73D                        | E73D mutated using primers HuPTEN5BamHI2, HuPTEN3XhoI2, PTEN-Q17R-f, and PTEN-Q17R-r and inserted into BglII/XhoI pKF3                       | This study           |
| pKF3-R41G,E73D                        | E73D mutated using primers HuPTEN5BamHI2, HuPTEN3XhoI2, PTEN-R41G-f, and PTEN-R41G-r and inserted into BglII/XhoI pKF3                       | This study           |
| pKF3-Q17R,R41G,E73D                   | R41G,E73D mutated using primers HuPTEN5BamHI2, HuPTEN3XhoI2, PTEN-Q17R-f, and PTEN-Q17R-r and inserted into BglII/XhoI pKF3                  | This study           |
| pKF3-Q17R,A4                          | Q17R amplified using primers HuPTEN5BamHI2 and HuPTEN3XhoI2 and inserted into BglII/NheI pKF3-A4                                             | This study           |
| pKF3-R41G,E73D,A4                     | R41G,E73D amplified using primers HuPTEN5BamHI2 and HuPTEN3XhoI2 and inserted into BglII/NheI pKF3-A4                                        | This study           |
| pKF3-Q17R,R41G,E73D,A4                | Q17R,R41G,E73D amplified using primers HuPTEN5BamHI2 and HuPTEN3XhoI2 and inserted into BglII/NheI pKF3-A4                                   | This study           |
| pKF3-Q17E                             | hPTEN mutated using primers HuPTEN5BamHI2, HuPTEN3XhoI2, PTEN-Q17E-f, and PTEN-Q17E-r and inserted into BglII/XhoI pKF3                      | This study           |
| pKF3-Q17E,A4                          | Q17E amplified using primers HuPTEN5BamHI2 and HuPTEN3XhoI2 and inserted into BglII/NheI pKF3-A4                                             | This study           |
| pKF3-Q17E,R41G,E73D                   | R41G,E73D mutated using primers HuPTEN5BamHI2, HuPTEN3XhoI2, PTEN-Q17E-f, and PTEN-Q17E-r and inserted into BglII/XhoI pKF3                  | This study           |
| pKF3-R11G                             | hPTEN mutated using primers HuPTEN5BamHI2, HuPTEN3XhoI2, and PTEN-R11G-f and inserted into BglII/XhoI pKF3                                   | This study           |
| pKF3-R11G,A4                          | R11G amplified using primers HuPTEN5BamHI2 and HuPTEN3XhoI2 and inserted into BglII/NheI pKF3-A4                                             | This study           |
| pKF3-K13A,A4                          |                                                                                                                                              | Gift from D. Bolduc* |
| pKF3-R14A,A4                          |                                                                                                                                              | Gift from D. Bolduc  |
| pKF3-R15A,A4                          |                                                                                                                                              | Gift from D. Bolduc  |
| pKF3-K13A,R14A,R15A,A4                | hPTEN mutated using primers HuPTEN5BamHI2, HuPTEN3XhoI2, and PTEN-K13A,R14A,R15A-f and inserted into BglII/XhoI pKF3                         | This study           |
| pKF3-N262Y,N329H                      |                                                                                                                                              | (1)                  |
| pKF3-N262Y,N329H,A4                   |                                                                                                                                              | (1)                  |
| pKF3-R41G,E73D,N262Y,N329H            | N262Y,N329H amplified using primers HuPTEN5BamHI2 and HuPTEN3XhoI2 and inserted into BglII/XhoI pKF3-R41G,E73D                               | This study           |
| pKF3-R41G,E73D,N262Y,N329,A4          | R41G,E73D,N262Y,N329H amplified using primers HuPTEN5BamHI2 and HuPTEN3XhoI2 and inserted into BglII/NheI pKF3-A4                            | This study           |
| pKF3-Q17R,R41G,E73D,N262Y,N329H       | N262Y,N329H amplified using primers HuPTEN5BamHI2 and HuPTEN3XhoI2 and inserted into BglII/XhoI pKF3-Q17R,R41G,E73D                          | This study           |
| pKF3-Q17R,R41G,E73D,N262Y,N329,A4     | Q17R,R41G,E73D,N262Y,N329H amplified using primers HuPTEN5BamHI2 and HuPTEN3XhoI2 and inserted into BglII/NheI pKF3-A4                       | This study           |
| pKF3-Q17E,R41G,E73D,N262Y,N329H       | N262Y,N329H amplified using primers HuPTEN5BamHI2 and HuPTEN3XhoI2 and inserted into BglII/XhoI pKF3-Q17E,R41G,E73D                          | This study           |
| pKF3-Q17R,R41G,E73D,C124S,N262Y,N329H | Q17R,R41G,E73D,N262Y,N329H mutated using primers HuPTEN5BamHI2, HuPTEN3XhoI2, PTEN-C124Sf, and PTEN-C124Sr and inserted into BglII/XhoI pKF3 | This study           |
| pKF3-Q17E,R41G,E73D,C124S,N262Y,N329H | Q17E,R41G,E73D,N262Y,N329H mutated using primers HuPTEN5BamHI2, HuPTEN3XhoI2, PTEN-C124Sf, and PTEN-C124Sr and inserted into BglII/XhoI pKF3 | This study           |
| pcDNA3.1                              |                                                                                                                                              | Invitrogen           |
| pcDNA3.1-hPTEN352-403-YFP-FLAG        |                                                                                                                                              | (2)                  |
| pcDNA3.1-hPTEN                        | hPTEN-GFP amplified using primers PTEN-TOPO-f and GFP-TOPO-r and inserted into pcDNA3.1                                                      | (1)                  |

Table S2. Cont.

| Plasmids                                   | Description                                                                                                                          | Source                            |
|--------------------------------------------|--------------------------------------------------------------------------------------------------------------------------------------|-----------------------------------|
| pcDNA3.1-A4                                | A4-GFP amplified using primers PTEN-TOPO-f and GFP-TOPO-r and inserted into pcDNA3.1                                                 | (1)                               |
| pcDNA3.1-C124S,A4                          | C124S,A4-GFP amplified using primers PTEN-TOPO-f and GFP-TOPO-r and inserted into pcDNA3.1                                           | (1)                               |
| pcDNA3.1-C124S                             | C124S-GFP amplified using primers PTEN-TOPO-f and GFP-TOPO-r and inserted into pcDNA3.1                                              | (1)                               |
| pcDNA3.1-R41G,E73D                         | R41G,E73D-GFP amplified using primers PTEN-TOPO-f and GFP-TOPO-r and inserted into pcDNA3.1                                          | This study                        |
| pcDNA3.1-Q17R,R41G,E73D                    | Q17E,R41G,E73D-GFP amplified using primers PTEN-TOPO-f and GFP-TOPO-r and inserted into pcDNA3.1                                     | This study                        |
| pcDNA3.1-N262Y,N329H                       | N262Y,N329H-GFP amplified using primers PTEN-TOPO-f and GFP-TOPO-r and inserted into pcDNA3.1                                        | (1)                               |
| pcDNA3.1-R41G,E73D,N262Y,N329H             | R41G,E73D,N262Y,N329H-GFP amplified using primers PTEN-TOPO-f and GFP-TOPO-r and inserted into pcDNA3.1                              | This study                        |
| pcDNA3.1-Q17R,R41G,E73D,N262Y,N329H        | Q17R,R41G,E73D,N262Y,N329H-GFP amplified using primers PTEN-TOPO-f and GFP-TOPO-r and inserted into pcDNA3.1                         | This study                        |
| pcDNA3.1-R41G,E73D,N262Y,N329H,A4          | R41G,E73D,N262Y,N329H,A4-GFP amplified using primers PTEN-TOPO-f and GFP-TOPO-r and inserted into pcDNA3.1                           | This study                        |
| pcDNA3.1-Q17R,R41G,E73D,N262Y,N329H,A4     | Q17R,R41G,E73D,N262Y,N329H,A4-GFP amplified using primers PTEN-TOPO-f and GFP-TOPO-r and inserted into pcDNA3.1                      | This study                        |
| pcDNA3.1-Q17E,R41G,E73D,N262Y,N329H        | Q17E,R41G,E73D,N262Y,N329H-GFP amplified using primers PTEN-TOPO-f and GFP-TOPO-r and inserted into pcDNA3.1                         | This study                        |
| pcDNA3.1-Q17R,R41G,E73D,C124S,N262Y,N329H  | Q17R,R41G,E73D,C124S,N262Y,N329H-GFP amplified using primers PTEN-TOPO-f and GFP-TOPO-r and inserted into pcDNA3.1                   | This study                        |
| pcDNA3.1-Q17E,R41G,E73D,C124S,N262Y,N329H  | Q17E,R41G,E73D,C124S,N262Y,N329H-GFP amplified using primers PTEN-TOPO-f and GFP-TOPO-r and inserted into pcDNA3.1                   | This study                        |
| pmCherry-PH <sub>AKT</sub>                 |                                                                                                                                      | Gift from T. Inoue*               |
| peGFP-PH <sub>PLC<math>\beta</math>6</sub> |                                                                                                                                      | Gift from T. Inoue                |
| peGFP <sub>LactC2</sub>                    |                                                                                                                                      | Gift from T. Inoue                |
| pHR-SIN-CSGW                               |                                                                                                                                      | Gift from T. Waldman <sup>†</sup> |
| pHR-SIN-hPTEN                              | hPTEN-GFP amplified using primers PTEN-BamHI-Kozak-f and GFP-NotI-r and inserted into BamHI/NotI pHR-SIN-CSGW                        | This study                        |
| pHR-SIN-A4                                 | A4-GFP amplified using primers PTEN-BamHI-Kozak-f and GFP-NotI-r and inserted into BamHI/NotI pHR-SIN-CSGW                           | This study                        |
| pHR-SIN-C124S                              | C124S-GFP amplified using primers PTEN-BamHI-Kozak-f and GFP-NotI-r and inserted into BamHI/NotI pHR-SIN-CSGW                        | This study                        |
| pHR-SIN-Q17R,R41G,E73D,N262Y,N329H         | Q17R,R41G,E73D,N262Y,N329H-GFP amplified using primers PTEN-BamHI-Kozak-f and GFP-NotI-r and inserted into BamHI/NotI pHR-SIN-CSGW   | This study                        |
| pHR-SIN-Q17R,R41G,E73D,C124S,N262Y,N329H   | Q17R,R41G,E73D,C124S,N262Y,N329H amplified using primers PTEN-BamHI-Kozak-f and GFP-NotI-r and inserted into BamHI/NotI pHR-SIN-CSGW | This study                        |
| pHR-SIN-Q17E,R41G,E73D,C124S,N262Y,N329H   | Q17E,R41G,E73D,C124S,N262Y,N329H amplified using primers PTEN-BamHI-Kozak-f and GFP-NotI-r and inserted into BamHI/NotI pHR-SIN-CSGW | This study                        |
| pHRCMV8.2 $\Delta$ R                       |                                                                                                                                      | Gift from T. Waldman              |
| pCMV-VSVG                                  |                                                                                                                                      | Gift from T. Waldman              |

\*The Johns Hopkins University School of Medicine, Baltimore.

<sup>†</sup>Georgetown University School of Medicine, Washington, DC.

1. Nguyen HN, et al. (2013) Mechanism of human PTEN localization revealed by heterologous expression in Dictyostelium. *Oncogene*, 10.1038/nc.2013.507.

2. Rahdar M, et al. (2009) A phosphorylation-dependent intramolecular interaction regulates the membrane association and activity of the tumor suppressor PTEN. *Proc Natl Acad Sci USA* 106(2):480–485.
